# Supplementary material for: Investigating the Probiotic Potential of Vegan Puree Mixture: Viability during Simulated Digestion and Bioactive Compound Bioaccessibility
Source: MDPI journal article supplement (doi:10.3390/nu16040561), 2024-02-18
Supplement: s1 [file s1]

Table S1: Sensory descriptors and their definitions used in the sensory analysis of breakfast mixture.

| Descriptors                | Definition                                                                                                                   | Anchors                          |
|----------------------------|------------------------------------------------------------------------------------------------------------------------------|----------------------------------|
| <b>Odour descriptors</b>   |                                                                                                                              |                                  |
| <b>Apple</b>               | Odour characteristic of apple and apple-based products                                                                       | "none" to "very intense."        |
| <b>Cinnamon</b>            | Odour characteristic of cinnamon                                                                                             | "none" to "very intense."        |
| <b>Fermented</b>           | Odour characteristic of fermented apple                                                                                      | "none" to "very intense."        |
| <b>Sweet</b>               | The basic differentiator does not require characterization                                                                   | "none" to "very intense."        |
| <b>Other</b>               | Odour other than those described above                                                                                       | "none" to "very intense."        |
| <b>Texture attributes</b>  |                                                                                                                              |                                  |
| <b>Thickness</b>           | A bulky characteristic of a product as sensed in mouth or by feeling and seeing e.g. During pouring of the product.          | "very liquid" to "very thick."   |
| <b>Stickiness</b>          | Adhesion to processing equipment, cohesion of powders, sticking to packaging, and sticking to fingers and parts of the mouth | "imperceptible" to "very stick." |
| <b>Flavour descriptors</b> |                                                                                                                              |                                  |
| <b>Apple</b>               | Flavour characteristic of apple and apple-based products                                                                     | "none" to "very intense."        |
| <b>Cinnamon</b>            | Flavour characteristic of cinnamon                                                                                           | "none" to "very intense."        |
| <b>Fermented</b>           | Flavour characteristic of products subjected to fermentation.                                                                | "none" to "very intense."        |
| <b>Sweet</b>               | The basic differentiator does not require characteristics (flavour characteristic of white sugar)                            | "none" to "very intense."        |
| <b>Acid</b>                | Flavour characteristic of products subjected to acids.                                                                       | "none" to "very intense."        |
| <b>Bitter</b>              | The basic distinguishing feature does not require characteristics (bitter flavour characteristic of grapefruit)              | "none" to "very intense."        |
| <b>Other</b>               | Enter the intensity and name or associate                                                                                    | "none" to "very intense."        |
| <b>Overall quality</b>     | Impression based on all testes                                                                                               | "very low" to "very high."       |

**Table S2.** BRC—control sample with oat bran, FLC control sample with oat flakes, BR3 and FL3 puree mixtures with *L. rhamnosus* K3 fermentation, BR4 and FL4 puree mixtures with *L. johnsonii* K4, fermentation, FLCi,FL3i,FL4I,BRCi,BR3i,BR4i are samples after digestion. Organic acids and sugars before and after digestion in the analyzed samples; a. samples with oat flakes; b. samples with bran.

| Sample | Citric Acid<br>(mg/mL) | Malic Acid<br>(mg/mL) | Lactic Acid<br>(mg/mL) | Acetic Acid<br>(mg/mL) | Propionic Acid<br>(mg/mL) | Disaccharides<br>(mg/mL) | Glucose<br>(mg/mL) | Fructose<br>(mg/mL) |
|--------|------------------------|-----------------------|------------------------|------------------------|---------------------------|--------------------------|--------------------|---------------------|
| BR3    | 0.0 ± 0.0              | 3.53 ± 0.07           | 2.3 ± 0.0              | 4.933 ± 0.057          | 0.0 ± 0.0                 | 13.167 ± 0.577           | 2.6 ± 0.0          | 19.07 ± 0.192       |
| BR3i   | 0.0 ± 0.0              | 11.9 ± 0.0            | 7.033 ± 0.057          | 11.067 ± 0.057         | 0.0 ± 0.0                 | 58.0 ± 0.67              | 19.9 ± 0.47        | 28.43 ± 0.53        |
| BR4    | 0.0 ± 0.0              | 3.733 ± 0.057         | 2.3 ± 0.0              | 4.8 ± 0.057            | 0.0 ± 0.0                 | 14.467 ± 0.167           | 2.533 ± 0.167      | 19.567 ± 0.167      |
| BR4i   | 0 ± 0                  | 12.57 ± 0.19          | 7.67 ± 0.25            | 12.87 ± 0.34           | 11.9 ± 0.25               | 57.83 ± 0.37             | 20.13 ± 0.37       | 28.83 ± 0.37        |
| BRC    | 0.6 ± 0.0              | 4.133 ± 0.057         | 0.0 ± 0.0              | 1.166 ± 0.057          | 0.0 ± 0.0                 | 14.033 ± 0.167           | 2.933 ± 0.057      | 18.733 ± 0.167      |
| BRCi   | 0.0 ± 0.0              | 12.3 ± 0.0            | 0.0 ± 0.0              | 3.433 ± 0.057          | 0.0 ± 0.0                 | 63.633 ± 0.577           | 19.6 ± 0.47        | 31.7 ± 0.472        |
| FL3    | 0.0 ± 0.0              | 1.767 ± 0.057         | 6.3 ± 0.0              | 1.7 ± 0.0              | 0.0 ± 0.0                 | 16.3 ± 0.167             | 4.533 ± 0.057      | 22.4 ± 0.2          |
| FL3i   | 0.0 ± 0.0              | 7.1 ± 0.0             | 29.167 ± 0.167         | 10.467 ± 0.057         | 3.233 ± 0.057             | 45.1 ± 0.577             | 20.167 ± 0.167     | 36.833 ± 0.1        |
| FL4    | 0.0 ± 0.0              | 1.933 ± 0.057         | 6.3 ± 0.0              | 1.467 ± 0.057          | 0.0 ± 0.0                 | 18.267 ± 0.167           | 5.367 ± 0.167      | 25.633 ± 0.167      |
| FL4i   | 0 ± 0                  | 7.8 ± 0.16            | 28.3 ± 0.76            | 10.07 ± 0.53           | 3.17 ± 0.09               | 48.6 ± 1.33              | 19.8 ± 0.41        | 37.6 ± 0.53         |
| FLC    | 0.333 ± 0.057          | 2.733 ± 0.057         | 0.0 ± 0.0              | 0.7 ± 0.0              | 0.0 ± 0.0                 | 18.9 ± 0.167             | 7.333 ± 0.057      | 21.833 ± 0.167      |
| FCLi   | 0.0 ± 0.0              | 7.9 ± 0.0             | 0.0 ± 0.0              | 7.267 ± 0.057          | 0.0 ± 0.0                 | 48.4 ± 0.833             | 20.567 ± 0.167     | 32.0 ± 0.353        |
